# Supplementary material
Source: publisher figshare collection journal article supplement (https://acs.figshare.com/ndownloader/files/4323385)
Supplement: Supplementary file 1 [file 4323385]

**Table S1. Characteristics and meteorological parameters for the sampling sites**

| <b>Name of plant/site</b> | <b>Design flow(MLD)</b> | <b>Dry flow (MLD)</b> | <b>Number of unit in operations</b> | <b>Total number of samples</b> | <b>Wind speed m/sec</b> | <b>Predominated wind direction</b> | <b>Temp (°C)</b> | <b>Relative Humidity (%)</b> |
|---------------------------|-------------------------|-----------------------|-------------------------------------|--------------------------------|-------------------------|------------------------------------|------------------|------------------------------|
| <b>WWTP1</b>              | 101                     | 28                    | 2                                   | 6<br>(Gc-4, Of-2)              | 0.4                     | NW                                 | 35.4             | 49.93                        |
| <b>WWTP2</b>              | 450                     | 399                   | 2                                   | 6<br>(Gc-4, Of-2)              | 0.8                     | S                                  | 34.9             | 48.77                        |
| <b>WWTP3</b>              | 800                     | 425                   | 4                                   | 12<br>(Gc-6, Sc-3, -Of-3)      | 0.5                     | NW                                 | 32.9             | 60.90                        |
| <b>WWTP4</b>              | 180                     | 120                   | 4                                   | 10<br>(Gc-4, Lg-4, Of-2)       | 1.7                     | N                                  | 34.6             | 54.96                        |
| <b>WWTP5</b>              | 180                     | 110                   | 5                                   | 15<br>(Gc-6, Lg-7, Of-2)       | 2.4                     | SE                                 | 33.2             | 55.60                        |
| <b>WWTP6</b>              | 150                     | 100                   | 5                                   | 14<br>(Gc-8, Lg-6)             | 2.5                     | SW                                 | 34.2             | 49.80                        |

Gc-Grit chamber, Lg-Lagoon, Of-Office area

The characteristics of each wastewater treatment plant were obtained from plant daily work dairy. The unit operations aerosolizes bioaerosols into atmosphere were chosen based on physical observation and preliminary measurements. Number of sample was varied due to number of unit operations were in operation during sampling day. Also in some plant the number of sample variation is due to inclusion of preliminary data. A hand held anemometer and wind vane (Weather Technologies, India) were used to record the wind direction and wind speed. The temperature and humidity were recorded every minute using HOB0 data logger. These parameters were monitored for every 15 minutes during the sampling period. The table shows one hour average values of various parameters.

**Table S2. Summary of airborne endotoxin (EU/m<sup>3</sup>) concentration at sampling sites**

| <b>Location</b> | <b>Number of samples</b> | <b>Overall Conc.</b> | <b>Percentage of samples exceeding exposure limit (DEC)</b> | <b>Conc. Near Source</b> | <b>Conc. Office area</b> |
|-----------------|--------------------------|----------------------|-------------------------------------------------------------|--------------------------|--------------------------|
| WWTP1           | 6                        | 340± 285*            | 67                                                          | 509±150                  | 2±11                     |
| WWTP2           | 6                        | 61 ±85               | 33                                                          | 91±138                   | 3±6                      |
| WWTP3           | 12                       | 97±67                | 67                                                          | 129±79                   | 1.8±2                    |
| WWTP4           | 10                       | 210±195              | 70                                                          | 261±237                  | 5±1.5                    |
| WWTP5           | 15                       | 104±80               | 47                                                          | 119±91                   | 2.5±0.1                  |
| WWTP6           | 14                       | 32±25                | 21                                                          | 32±25                    | -                        |
| <b>Over all</b> | <b>-</b>                 | <b>122±45</b>        | <b>49</b>                                                   | <b>147±53</b>            | <b>2.6±0.8</b>           |

\*Uncertainty is expressed as 95% confidence interval about the mean value

Overall concentration of airborne endotoxin at each plant was calculated by averaging the individual concentration of each sample. Percentage of samples exceeding exposure limit was calculated by comparing the current study values( 1 hour averaged) with Netherlands Dutch Expert Committee (DEC) recommended a health based exposure limit of 50 EUm<sup>-3</sup>(≈ 4.5 ng m<sup>-3</sup>) Theses standards are calculated based 8 hours of exposure in working environment.

**Table S3. Normalized rotated factor scores of bacterial species data over the office area of wastewater treatment plants**

| Sample No. | Factors |        |        |       |
|------------|---------|--------|--------|-------|
|            | I       | II     | III    | IV    |
| 1          | -8.93   | 2.37   | -6.58  | 82.13 |
| 2          | -7.71   | 2.84   | -10.14 | 79.30 |
| 3          | -2.72   | 1.59   | -9.78  | 85.91 |
| 4          | 6.02    | -68.46 | 8.51   | 17.01 |
| 5          | 15.52   | 4.66   | 56.87  | 22.96 |
| 6          | 7.89    | 3.67   | 84.93  | 3.51  |
| 7          | -3.68   | 2.38   | 88.92  | -5.02 |
| 8          | -13.57  | 2.40   | 4.68   | 79.35 |
| 9          | -14.81  | 1.24   | 1.36   | 82.60 |
| 10         | 68.97   | 3.22   | -20.87 | -6.94 |
| 11         | 13.96   | 4.10   | -4.19  | 77.75 |

R-mode principal component analysis was used for the analyzing the relationship among bacterial species in the samples. Components and their contributions in the samples (factor scores) were calculated. The factors were rotated (Varimax rotation) to simplify the relationship between the variables and classified factors. First three factors explain 78% of the data variability. The factor score corresponding to the office area samples are given in the table. Table indicates that office area samples are strongly associated with fourth factor.
